# Supplementary material for: Dynamic Change of Global and Local Information Processing in Propofol-Induced Loss and Recovery of Consciousness
Source: PubMed Central journal article supplement (PMC3798283; doi:10.1371/journal.pcbi.1003271), 2013-10-17
Supplement: pcbi.1003271.s002.pdf [file pcbi.1003271.s002.pdf]

|                            | (W&R) vs. (S&LOC)<br>Count<br>(%pos, %neg) | (S&LOC) vs. (W&R)<br>Count<br>(%pos, %neg) |
|----------------------------|--------------------------------------------|--------------------------------------------|
| Cortico-Cortical           | 178 (100, 0)                               | 137 (59, 41)                               |
| <i>Fronto-Frontal</i>      | 1 (100, 0)                                 | 25 (96, 4)                                 |
| <i>Fronto-Temporal</i>     | 27 (100, 0)                                | 29 (66, 34)                                |
| <i>Fronto-Parietal</i>     | 1 (100, 0)                                 | 26 (58, 42)                                |
| <i>Fronto-Occipital</i>    | 11 (100, 0)                                | 8 (13, 88)                                 |
| <i>Temporo-Temporal</i>    | 12 (100, 0)                                | 10 (60, 40)                                |
| <i>Temporo-Parietal</i>    | 29 (100, 0)                                | 11 (64, 36)                                |
| <i>Temporo-Occipital</i>   | 96 (100, 0)                                | 1 (0, 100)                                 |
| <i>Parieto-Parietal</i>    |                                            | 9 (56, 44)                                 |
| <i>Parieto-Occipital</i>   |                                            | 10 (30, 70)                                |
| <i>Occipito-Occipital</i>  | 1 (100, 0)                                 | 8 (13, 88)                                 |
| <i>Striato-Cortical</i>    | 1 (100, 0)                                 | 4 (100, 0)                                 |
| <i>Striato-Frontal</i>     | 1 (100, 0)                                 | 1 (100, 0)                                 |
| <i>Striato-Temporal</i>    |                                            |                                            |
| <i>Striato-Parietal</i>    |                                            | 2 (100, 0)                                 |
| <i>Striato-Occipital</i>   |                                            | 1 (100, 0)                                 |
| Thalamo-Cortical           | 1 (100, 0)                                 | 40 (95, 5)                                 |
| <i>Thalamo-Frontal</i>     |                                            | 15 (87, 13)                                |
| <i>Thalamo-Temporal</i>    |                                            | 6 (100, 0)                                 |
| <i>Thalamo-Parietal</i>    |                                            | 18 (100, 0)                                |
| <i>Thalamo-Occipital</i>   | 1 (100, 0)                                 | 1 (100, 0)                                 |
| Tronco-Cortical            |                                            | 1 (100, 0)                                 |
| <i>Tronco-Frontal</i>      |                                            |                                            |
| <i>Tronco-Temporal</i>     |                                            | 1 (100, 0)                                 |
| <i>Tronco-Parietal</i>     |                                            |                                            |
| <i>Tronco-Occipital</i>    |                                            |                                            |
| Cerebello-Cortical         | 6 (100, 0)                                 | 3 (0, 100)                                 |
| <i>Cerebello-Frontal</i>   |                                            | 2 (0, 100)                                 |
| <i>Cerebello-Temporal</i>  | 4 (100, 0)                                 | 1 (0, 100)                                 |
| <i>Cerebello-Parietal</i>  |                                            |                                            |
| <i>Cerebello-Occipital</i> | 2 (100, 0)                                 |                                            |
| Striato-Striatal           |                                            |                                            |
| Thalamo-Striatal           |                                            | 2 (100, 0)                                 |
| Tronco-Striatal            |                                            |                                            |
| Cerebello-Striatal         |                                            |                                            |
| Thalamo-Thalamic           |                                            |                                            |
| Tronco-Thalamic            |                                            |                                            |
| Cerebello-Thalamic         | 1 (100, 0)                                 |                                            |
| Tronco-TroncoEncephalic    |                                            |                                            |
| Cerebello-TroncoEncephalic |                                            |                                            |
| Cerebello-Cerebellar       |                                            |                                            |
