# Supplementary material for: Dynamic Change of Global and Local Information Processing in Propofol-Induced Loss and Recovery of Consciousness
Source: PubMed Central journal article supplement (PMC3798283; doi:10.1371/journal.pcbi.1003271), 2013-10-17
Supplement: pcbi.1003271.s003.pdf [file pcbi.1003271.s003.pdf]

|                            | <b>S vs. W</b> | <b>LOC vs. S</b> | <b>R vs. LOC</b> |
|----------------------------|----------------|------------------|------------------|
|                            | Count          | Count            | Count            |
|                            | (%pos, %neg)   | (%pos, %neg)     | (%pos, %neg)     |
| Cortico-Cortical           | 102 (100, 0)   | 158 (11, 89)     | 182 (100, 0)     |
| <i>Fronto-Frontal</i>      | 48 (100, 0)    | 19 (42, 58)      | 30 (100, 0)      |
| <i>Fronto-Temporal</i>     | 27 (100, 0)    | 28 (21, 79)      | 16 (100, 0)      |
| <i>Fronto-Parietal</i>     | 16 (100, 0)    | 24 (0, 100)      | 18 (100, 0)      |
| <i>Fronto-Occipital</i>    | 1 (100, 0)     | 25 (0, 100)      | 3 (100, 0)       |
| <i>Temporo-Temporal</i>    | 2 (100, 0)     | 6 (50, 50)       | 7 (100, 0)       |
| <i>Temporo-Parietal</i>    | 1 (100, 0)     | 1 (0, 100)       | 30 (100, 0)      |
| <i>Temporo-Occipital</i>   |                | 2 (0, 100)       | 74 (100, 0)      |
| <i>Parieto-Parietal</i>    | 4 (100, 0)     | 15 (0, 100)      | 2 (100, 0)       |
| <i>Parieto-Occipital</i>   | 2 (100, 0)     | 36 (0, 100)      | 2 (100, 0)       |
| <i>Occipito-Occipital</i>  | 1 (100, 0)     | 2 (0, 100)       |                  |
| <i>Striato-Cortical</i>    | 1 (100, 0)     | 16 (100, 0)      | 2 (100, 0)       |
| <i>Striato-Frontal</i>     | 1 (100, 0)     | 8 (100, 0)       | 1 (100, 0)       |
| <i>Striato-Temporal</i>    |                | 3 (100, 0)       | 1 (100, 0)       |
| <i>Striato-Parietal</i>    |                | 1 (100, 0)       |                  |
| <i>Striato-Occipital</i>   |                | 4 (100, 0)       |                  |
| Thalamo-Cortical           | 76 (100, 0)    | 6 (100, 0)       |                  |
| <i>Thalamo-Frontal</i>     | 37 (100, 0)    | 6 (100, 0)       |                  |
| <i>Thalamo-Temporal</i>    | 10 (100, 0)    |                  |                  |
| <i>Thalamo-Parietal</i>    | 29 (100, 0)    |                  |                  |
| <i>Thalamo-Occipital</i>   |                |                  |                  |
| Tronco-Cortical            | 7 (100, 0)     |                  |                  |
| <i>Tronco-Frontal</i>      | 3 (100, 0)     |                  |                  |
| <i>Tronco-Temporal</i>     | 1 (100, 0)     |                  |                  |
| <i>Tronco-Parietal</i>     | 3 (100, 0)     |                  |                  |
| <i>Tronco-Occipital</i>    |                |                  |                  |
| Cerebello-Cortical         | 1 (100, 0)     | 5 (100, 0)       | 3 (100, 0)       |
| <i>Cerebello-Frontal</i>   |                | 3 (100, 0)       |                  |
| <i>Cerebello-Temporal</i>  | 1 (100, 0)     | 1 (100, 0)       | 3 (100, 0)       |
| <i>Cerebello-Parietal</i>  |                |                  |                  |
| <i>Cerebello-Occipital</i> |                | 1 (100, 0)       |                  |
| Striato-Striatum           |                |                  |                  |
| Thalamo-Striatum           |                | 2 (100, 0)       |                  |
| Tronco-Striatum            |                |                  |                  |
| Cerebello-Striatum         |                |                  |                  |
| Thalamo-Thalamic           |                |                  |                  |
| Tronco-Thalamic            |                |                  |                  |
| Cerebello-Thalamic         |                |                  |                  |
| Tronco-TroncoEncephalic    |                |                  |                  |
| Cerebello-TroncoEncephalic |                |                  |                  |
| Cerebello-Cerebellar       |                |                  |                  |
